# Supplementary material for: Geographic variation in the treatment of spinal disorders: association with health care professional availability, and population socioeconomic status, race, and ethnicity. A retrospective cohort study
Source: bioRxiv or medRxiv preprint supplement (doi:10.1101/2022.08.15.22278722), 2022-08-17
Supplement: Supplementary file [file media-2.pdf]

**Supplement 1 - Cohort**

|                             |            |
|-----------------------------|------------|
| Zip Codes                   | 29318      |
| Individuals                 | 1075204    |
| Complete Episodes           | 1534280    |
| Health Care Providers (HCP) | 531115     |
| Total Episode Cost          | 2022124695 |

**Episodes - Median (IQR)(Q1, Q3)**

|                    |                     |
|--------------------|---------------------|
| Total Episode Cost | 221 (618) (87, 705) |
|--------------------|---------------------|

**Episode Timing - Median (IQR)(Q1, Q3)(Minimum)**

|                                                 |                           |
|-------------------------------------------------|---------------------------|
| Episode Durations (days)                        | 26 (133) (1, 134) (1)     |
| Clean Period Before Initial Episode (days)      | 621 (444) (409, 853) (91) |
| Clean Period Between Sequential Episodes (days) | 202 (216) (120, 336) (61) |
| Clean Period After Final Episode (days)         | 435 (424) (266, 690) (61) |

**Individuals - % or Median (IQR)(Q1, Q3)**

|                         |                          |
|-------------------------|--------------------------|
| Female %                | 54.9%                    |
| Age (years)             | 44.0 (20.0) (34.0, 54.0) |
| ERG® Risk Score         | 1.5 (0.9) (1.1, 2.0)     |
| Episodes Per Individual | 1.0 (1.0) (1.0, 2.0)     |

**Zip Code Characteristics - Median (IQR)(Q1, Q3)**

|                                   |                         |
|-----------------------------------|-------------------------|
| Episodes per zip code - mean (SD) | 12.0 (48.0) (3.0, 51.0) |
|-----------------------------------|-------------------------|
