# Supplementary material for: Geographic variation in the treatment of spinal disorders: association with health care professional availability, and population socioeconomic status, race, and ethnicity. A retrospective cohort study
Source: bioRxiv or medRxiv preprint supplement (doi:10.1101/2022.08.15.22278722), 2022-08-17
Supplement: Supplementary file [file media-3.pdf]

| Supplement 2 - Cohort and population attributes by zip code Area Deprivation Index (ADI) and population % non-Hispanic white (NHW) segments |                                                |               |               |                                |                           |                      |                                  |                                                               |                                                                  |                                                         |
|---------------------------------------------------------------------------------------------------------------------------------------------|------------------------------------------------|---------------|---------------|--------------------------------|---------------------------|----------------------|----------------------------------|---------------------------------------------------------------|------------------------------------------------------------------|---------------------------------------------------------|
| ZIP code Area Deprivation Index (ADI)                                                                                                       | ZIP code % Non-Hispanic White (NHW) population | Episodes      | % of Episodes | % Low back pain (LBP) episodes | % Neck pain (NP) episodes | Individuals % female | Individual age - Median (Q1, Q3) | Individual Episode Risk Group® (ERG®) score - Median (Q1, Q3) | ZIP code household Adjusted Gross Income (AGI) - Median (Q1, Q3) | ZIP code Area Deprivation Index (ADI) - Median (Q1, Q3) |
| Total                                                                                                                                       |                                                | 1534280       | 100.0%        | 65.6%                          | 34.4%                     | 56.0%                | 45 (34, 54)                      | 1.5 (0.7, 3.0)                                                | 65,144 (50,843, 91,603)                                          | 44.7 (27.4, 61.7)                                       |
| 75-100                                                                                                                                      | All                                            | 133334        | 8.7%          | 68.3%                          | 31.7%                     | 55.4%                | 45 (35, 54)                      | 1.6 (0.7, 3.2)                                                | 39,836 (33,617, 45,025)                                          | 80.5 (77.5, 84.6)                                       |
| 50-75                                                                                                                                       |                                                | 502531        | 32.8%         | 66.6%                          | 33.4%                     | 55.9%                | 45 (34, 54)                      | 1.5 (0.7, 3.1)                                                | 51,883 (46,185, 58,772)                                          | 61.4 (55.6, 67.5)                                       |
| 25-50                                                                                                                                       |                                                | 559487        | 36.5%         | 65.1%                          | 34.9%                     | 56.2%                | 45 (34, 54)                      | 1.4 (0.7, 2.9)                                                | 72,840 (62,612, 88,304)                                          | 37.9 (31.7, 43.9)                                       |
| 0-25                                                                                                                                        |                                                | 325481        | 21.2%         | 64.0%                          | 36.0%                     | 56.0%                | 45 (35, 54)                      | 1.4 (0.7, 2.9)                                                | 118,680 (94,064, 163,283)                                        | 16.0 (10.3, 20.7)                                       |
| All                                                                                                                                         |                                                | 0-25          | 125698        | 8.2%                           | 67.7%                     | 32.3%                | 58.0%                            | 44 (34, 54)                                                   | 1.5 (0.7, 3.0)                                                   | 40,620 (33,196, 50,146)                                 |
|                                                                                                                                             | 25-50                                          | 224009        | 14.6%         | 65.9%                          | 34.1%                     | 56.8%                | 44 (34, 54)                      | 1.5 (0.7, 3.0)                                                | 56,445 (45,523, 76,002)                                          | 48.9 (29.1, 64.5)                                       |
|                                                                                                                                             | 50-75                                          | 462283        | 30.1%         | 65.1%                          | 34.9%                     | 55.9%                | 45 (34, 54)                      | 1.5 (0.7, 3.1)                                                | 71,641 (54,239, 103,665)                                         | 41.0 (24.6, 57.2)                                       |
|                                                                                                                                             | 75-100                                         | 702250        | 45.8%         | 65.5%                          | 34.5%                     | 55.4%                | 46 (35, 55)                      | 1.4 (0.7, 2.9)                                                | 69,294 (55,356, 94,206)                                          | 42.7 (27.1, 59.2)                                       |
| 75-100                                                                                                                                      | 0-25                                           | 35387         | 2.3%          | 69.1%                          | 30.9%                     | 57.6%                | 45 (35, 54)                      | 1.5 (0.7, 3.1)                                                | 31,438 (28,692, 34,159)                                          | 82.5 (78.8, 86.3)                                       |
| 75-100                                                                                                                                      | 25-50                                          | 24343         | 1.6%          | 68.6%                          | 31.4%                     | 55.6%                | 45 (35, 54)                      | 1.6 (0.7, 3.2)                                                | 37,976 (34,676, 42,242)                                          | 80.7 (77.4, 83.9)                                       |
| 75-100                                                                                                                                      | 50-75                                          | 27185         | 1.8%          | 68.0%                          | 32.0%                     | 54.5%                | 46 (35, 55)                      | 1.7 (0.8, 3.3)                                                | 42,155 (38,215, 46,454)                                          | 79.4 (77.4, 83.5)                                       |
| 75-100                                                                                                                                      | 75-100                                         | 41486         | 2.7%          | 67.7%                          | 32.3%                     | 54.4%                | 46 (36, 55)                      | 1.6 (0.7, 3.2)                                                | 44,409 (40,715, 48,385)                                          | 79.1 (76.9, 82.3)                                       |
| 50-75                                                                                                                                       | 0-25                                           | 49075         | 3.2%          | 68.2%                          | 31.8%                     | 58.3%                | 44 (34, 54)                      | 1.5 (0.7, 3.0)                                                | 39,953 (35,382, 46,119)                                          | 64.9 (58.3, 70.6)                                       |
| 50-75                                                                                                                                       | 25-50                                          | 84091         | 5.5%          | 66.5%                          | 33.5%                     | 57.1%                | 45 (34, 54)                      | 1.5 (0.7, 3.1)                                                | 47,625 (42,656, 54,508)                                          | 62.6 (56.7, 67.6)                                       |
| 50-75                                                                                                                                       | 50-75                                          | 139453        | 9.1%          | 66.3%                          | 33.7%                     | 55.7%                | 45 (35, 54)                      | 1.6 (0.7, 3.2)                                                | 52,360 (46,862, 60,133)                                          | 60.2 (54.6, 67.2)                                       |
| 50-75                                                                                                                                       | 75-100                                         | 227907        | 14.9%         | 66.4%                          | 33.6%                     | 54.9%                | 46 (35, 55)                      | 1.5 (0.7, 3.0)                                                | 54,332 (49,961, 60,083)                                          | 60.9 (55.5, 66.9)                                       |
| 25-50                                                                                                                                       | 0-25                                           | 29006         | 1.9%          | 66.6%                          | 33.4%                     | 58.1%                | 44 (34, 53)                      | 1.5 (0.7, 2.9)                                                | 49,759 (44,209, 58,722)                                          | 38.6 (32.7, 44.9)                                       |
| 25-50                                                                                                                                       | 25-50                                          | 68794         | 4.5%          | 65.4%                          | 34.6%                     | 57.2%                | 43 (34, 53)                      | 1.4 (0.7, 2.9)                                                | 63,583 (55,155, 74,153)                                          | 40.0 (33.1, 45.5)                                       |
| 25-50                                                                                                                                       | 50-75                                          | 176075        | 11.5%         | 64.9%                          | 35.1%                     | 56.3%                | 44 (34, 54)                      | 1.5 (0.7, 3.0)                                                | 75,107 (64,092, 92,331)                                          | 37.5 (31.6, 43.7)                                       |
| <b>25-50</b>                                                                                                                                | <b>75-100</b>                                  | <b>284042</b> | <b>18.5%</b>  | <b>65.1%</b>                   | <b>34.9%</b>              | <b>55.7%</b>         | <b>45 (34, 54)</b>               | <b>1.4 (0.6, 2.9)</b>                                         | <b>75,830 (66,189, 89,491)</b>                                   | <b>37.7 (31.0, 43.4)</b>                                |
| 0-25                                                                                                                                        | 0-25                                           | 11611         | 0.8%          | 64.1%                          | 35.9%                     | 58.2%                | 45 (35, 53)                      | 1.3 (0.6, 2.8)                                                | 70,444 (58,651, 90,583)                                          | 16.7 (11.1, 20.8)                                       |
| 0-25                                                                                                                                        | 25-50                                          | 46561         | 3.0%          | 64.2%                          | 35.8%                     | 56.4%                | 43 (34, 53)                      | 1.4 (0.6, 2.8)                                                | 98,034 (79,027, 130,230)                                         | 16.3 (11.3, 20.5)                                       |
| 0-25                                                                                                                                        | 50-75                                          | 119064        | 7.8%          | 63.4%                          | 36.6%                     | 55.8%                | 44 (34, 54)                      | 1.4 (0.7, 2.9)                                                | 123,766 (101,180, 179,109)                                       | 15.1 (9.2, 20.3)                                        |
| 0-25                                                                                                                                        | 75-100                                         | 146789        | 9.6%          | 64.3%                          | 35.7%                     | 55.8%                | 46 (35, 55)                      | 1.4 (0.7, 2.9)                                                | 125,961 (99,965, 174,100)                                        | 16.7 (11.1, 20.9)                                       |
