# Supplementary material for: Geographic variation in the treatment of spinal disorders: association with health care professional availability, and population socioeconomic status, race, and ethnicity. A retrospective cohort study
Source: bioRxiv or medRxiv preprint supplement (doi:10.1101/2022.08.15.22278722), 2022-08-17
Supplement: Supplementary file [file media-5.pdf]

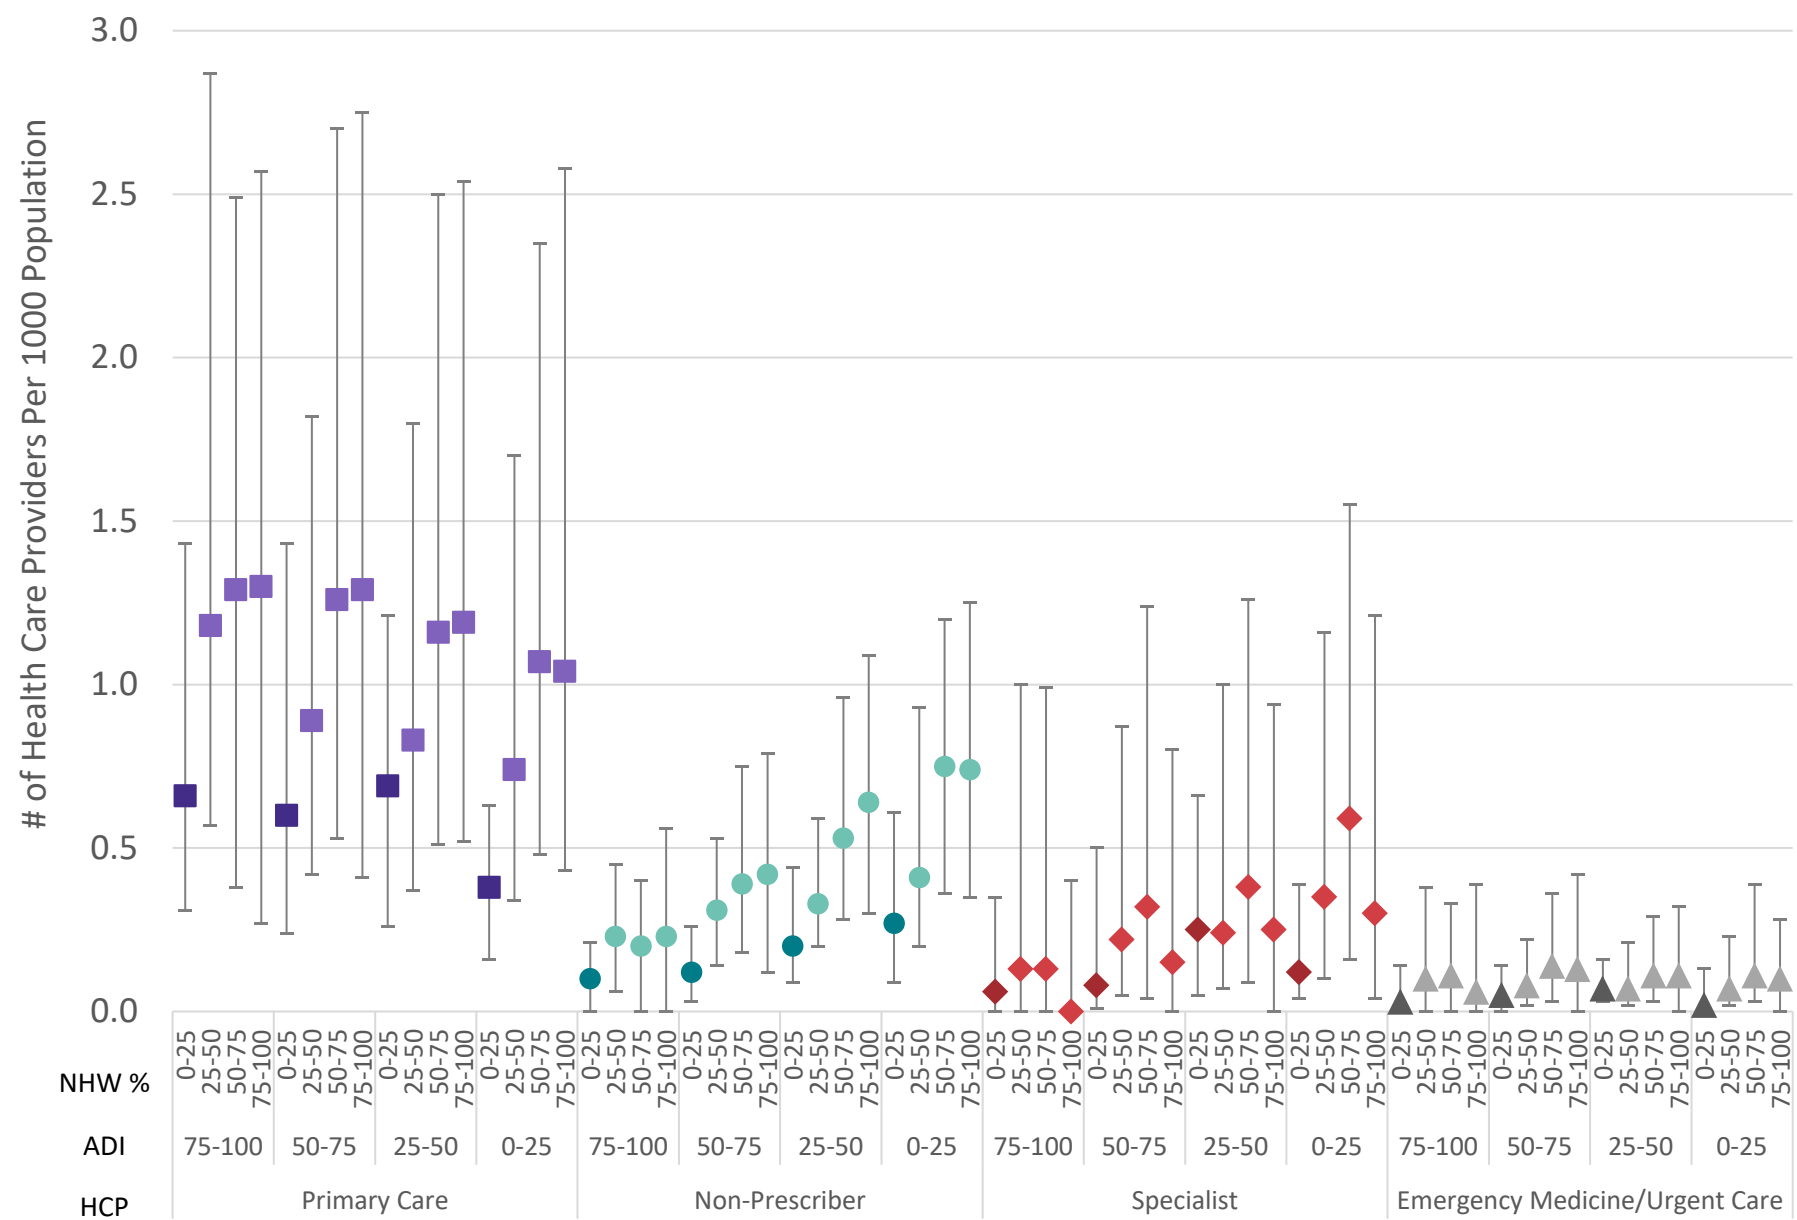

**Supplement 3a** - Median and interquartile range (IQR) for number of health care providers per 1000 population in 5 digit zip code by zip code Area Deprivation Index (ADI) and percent non-Hispanic white population (NHW%).
