# Supplementary material for: Geographic variation in the treatment of spinal disorders: association with health care professional availability, and population socioeconomic status, race, and ethnicity. A retrospective cohort study
Source: bioRxiv or medRxiv preprint supplement (doi:10.1101/2022.08.15.22278722), 2022-08-17
Supplement: Supplementary file [file media-6.pdf]

Supplement 4 - % of spinal disorder episodes where individual initially contacted health care provider type

| ADI    | % NHW      | Episodes | All          |                |            |                      | Primary Care |       |      |      | Non-Prescriber |      |      |      | Specialist |      |      |       |      | Emergency/<br>Urgent Care |      |      |      |
|--------|------------|----------|--------------|----------------|------------|----------------------|--------------|-------|------|------|----------------|------|------|------|------------|------|------|-------|------|---------------------------|------|------|------|
|        |            |          | Primary Care | Non-Prescriber | Specialist | Emergency/<br>Urgent | PCP          | Nurse | PA   | DO   | DC             | PT   | LAc  | OS   | PMR        | PM   | NS   | Neuro | Rheu | MD (Oth)                  | EM   | Rad  | UC   |
| Total  |            | 1510869  | 43.8%        | 35.2%          | 15.0%      | 6.0%                 | 32.8%        | 6.5%  | 4.3% | 0.1% | 33.5%          | 0.9% | 0.7% | 6.0% | 2.5%       | 1.1% | 1.1% | 1.3%  | 0.9% | 2.0%                      | 2.4% | 2.4% | 0.5% |
| 75-100 | All        | 128401   | 54.9%        | 25.6%          | 11.7%      | 7.8%                 | 38.4%        | 11.8% | 4.6% | 0.0% | 24.9%          | 0.4% | 0.1% | 4.4% | 1.6%       | 0.9% | 1.1% | 1.1%  | 0.9% | 1.7%                      | 4.3% | 3.1% | 0.4% |
| 50-75  |            | 500526   | 47.1%        | 34.0%          | 12.7%      | 6.2%                 | 34.1%        | 8.1%  | 4.8% | 0.1% | 33.2%          | 0.7% | 0.3% | 4.9% | 1.9%       | 1.1% | 1.1% | 1.2%  | 0.8% | 1.9%                      | 3.3% | 2.4% | 0.4% |
| 25-50  |            | 557917   | 41.8%        | 37.7%          | 14.8%      | 5.7%                 | 31.5%        | 5.5%  | 4.5% | 0.1% | 36.1%          | 1.1% | 0.7% | 5.9% | 2.5%       | 1.1% | 1.1% | 1.3%  | 0.9% | 2.0%                      | 2.8% | 2.2% | 0.7% |
| 0-25   |            | 324025   | 37.8%        | 36.7%          | 20.0%      | 5.6%                 | 31.0%        | 3.3%  | 3.2% | 0.1% | 33.3%          | 1.7% | 1.7% | 8.6% | 4.2%       | 1.0% | 1.1% | 1.8%  | 1.0% | 2.4%                      | 2.4% | 2.4% | 0.8% |
| All    | 0-25       | 125079   | 53.9%        | 20.5%          | 16.3%      | 9.3%                 | 43.9%        | 6.0%  | 4.0% | 0.0% | 18.6%          | 0.9% | 1.0% | 6.0% | 2.5%       | 1.2% | 1.0% | 1.9%  | 1.2% | 2.4%                      | 5.3% | 3.1% | 0.9% |
|        | 25-50      | 223789   | 46.9%        | 29.1%          | 17.3%      | 6.7%                 | 37.4%        | 5.5%  | 3.9% | 0.1% | 27.0%          | 1.0% | 1.0% | 7.4% | 2.9%       | 1.2% | 1.0% | 1.7%  | 1.0% | 2.2%                      | 3.5% | 2.5% | 0.7% |
|        | 50-75      | 461777   | 43.9%        | 33.7%          | 16.7%      | 5.7%                 | 33.7%        | 5.9%  | 4.2% | 0.1% | 31.8%          | 1.1% | 0.8% | 6.9% | 2.8%       | 1.2% | 1.1% | 1.5%  | 0.9% | 2.2%                      | 2.8% | 2.3% | 0.5% |
|        | 75-100     | 700224   | 41.3%        | 40.4%          | 12.9%      | 5.4%                 | 29.2%        | 7.2%  | 4.7% | 0.1% | 39.1%          | 0.9% | 0.4% | 5.0% | 2.3%       | 0.9% | 1.0% | 1.2%  | 0.8% | 1.8%                      | 2.6% | 2.3% | 0.5% |
| 75-100 | 0-25       | 35387    | 59.3%        | 16.9%          | 13.1%      | 10.7%                | 44.4%        | 9.1%  | 5.7% | 0.0% | 16.1%          | 0.6% | 0.3% | 4.9% | 1.9%       | 1.0% | 1.1% | 1.3%  | 1.0% | 1.9%                      | 6.4% | 3.4% | 0.7% |
|        | 25-50      | 24343    | 55.5%        | 23.1%          | 13.0%      | 8.4%                 | 38.5%        | 12.0% | 4.9% | 0.0% | 22.3%          | 0.5% | 0.1% | 5.0% | 1.8%       | 1.2% | 0.9% | 1.2%  | 0.9% | 1.9%                      | 4.6% | 3.4% | 0.4% |
|        | 50-75      | 27185    | 55.7%        | 25.0%          | 12.3%      | 7.0%                 | 39.2%        | 12.2% | 4.4% | 0.1% | 24.5%          | 0.5% | 0.1% | 4.4% | 1.5%       | 1.2% | 1.3% | 1.2%  | 0.9% | 1.7%                      | 4.0% | 2.8% | 0.3% |
|        | 75-100     | 41486    | 50.6%        | 34.1%          | 9.7%       | 5.6%                 | 33.1%        | 13.6% | 3.9% | 0.0% | 33.7%          | 0.4% | 0.0% | 3.6% | 1.2%       | 0.6% | 1.0% | 0.8%  | 0.8% | 1.6%                      | 2.7% | 2.7% | 0.1% |
| 50-75  | 0-25       | 49075    | 54.3%        | 20.6%          | 16.0%      | 9.1%                 | 44.4%        | 5.7%  | 4.0% | 0.1% | 19.3%          | 0.9% | 0.6% | 6.2% | 2.5%       | 1.2% | 0.9% | 1.9%  | 1.0% | 2.4%                      | 5.4% | 3.2% | 0.6% |
|        | 25-50      | 84091    | 49.7%        | 27.3%          | 16.1%      | 6.9%                 | 38.3%        | 6.3%  | 5.0% | 0.1% | 26.2%          | 0.8% | 0.4% | 6.7% | 2.5%       | 1.2% | 1.1% | 1.7%  | 1.0% | 2.1%                      | 3.9% | 2.5% | 0.6% |
|        | 50-75      | 139453   | 48.5%        | 31.3%          | 14.0%      | 6.2%                 | 35.6%        | 7.9%  | 5.0% | 0.1% | 30.3%          | 0.7% | 0.3% | 5.5% | 2.0%       | 1.2% | 1.2% | 1.3%  | 0.9% | 1.8%                      | 3.2% | 2.5% | 0.5% |
|        | 75-100     | 227907   | 43.9%        | 40.5%          | 10.2%      | 5.4%                 | 29.8%        | 9.2%  | 4.7% | 0.1% | 39.9%          | 0.5% | 0.1% | 3.7% | 1.5%       | 0.8% | 0.9% | 1.0%  | 0.6% | 1.5%                      | 2.7% | 2.3% | 0.4% |
| 25-50  | 0-25       | 29006    | 49.7%        | 22.2%          | 19.9%      | 8.2%                 | 43.2%        | 3.8%  | 2.7% | 0.0% | 19.5%          | 1.1% | 1.7% | 7.1% | 2.9%       | 1.5% | 0.9% | 2.9%  | 1.8% | 2.9%                      | 4.2% | 2.7% | 1.2% |
|        | 25-50      | 68794    | 44.8%        | 31.4%          | 17.6%      | 6.2%                 | 36.9%        | 4.3%  | 3.6% | 0.1% | 29.5%          | 1.1% | 1.0% | 7.5% | 3.0%       | 1.2% | 1.0% | 1.5%  | 1.0% | 2.2%                      | 3.2% | 2.2% | 0.8% |
|        | 50-75      | 176075   | 42.8%        | 35.3%          | 16.6%      | 5.2%                 | 33.2%        | 5.4%  | 4.3% | 0.1% | 33.7%          | 0.9% | 0.7% | 6.8% | 2.8%       | 1.3% | 1.2% | 1.5%  | 0.9% | 2.1%                      | 2.5% | 2.1% | 0.5% |
|        | 75-100 ref | 284042   | 39.9%        | 42.1%          | 12.6%      | 5.5%                 | 28.6%        | 6.3%  | 5.0% | 0.1% | 40.6%          | 1.0% | 0.4% | 4.9% | 2.2%       | 0.9% | 1.0% | 1.0%  | 0.8% | 1.8%                      | 2.6% | 2.3% | 0.6% |
| 0-25   | 0-25       | 11611    | 45.3%        | 27.4%          | 18.7%      | 8.7%                 | 41.3%        | 2.0%  | 1.8% | 0.2% | 21.3%          | 1.7% | 4.4% | 7.5% | 3.5%       | 0.9% | 0.8% | 2.4%  | 1.1% | 2.4%                      | 3.8% | 3.4% | 1.7% |
|        | 25-50      | 46561    | 39.9%        | 32.4%          | 21.7%      | 6.0%                 | 36.0%        | 2.2%  | 1.7% | 0.0% | 28.2%          | 1.6% | 2.6% | 9.5% | 4.5%       | 1.0% | 1.0% | 2.2%  | 1.2% | 2.6%                      | 2.4% | 2.4% | 1.2% |
|        | 50-75      | 119064   | 36.8%        | 36.6%          | 21.2%      | 5.4%                 | 31.3%        | 2.7%  | 2.8% | 0.1% | 33.0%          | 1.8% | 2.0% | 9.3% | 4.4%       | 1.1% | 1.0% | 1.8%  | 1.0% | 2.5%                      | 2.3% | 2.3% | 0.8% |
|        | 75-100     | 146789   | 37.3%        | 38.7%          | 18.7%      | 5.3%                 | 28.8%        | 4.3%  | 4.0% | 0.1% | 36.0%          | 1.6% | 1.1% | 8.1% | 3.9%       | 0.9% | 1.2% | 1.6%  | 0.9% | 2.2%                      | 2.3% | 2.4% | 0.5% |

PCP=Primary Care Provider, PA=Physician Assistant, DO=Doctor of Osteopathy, DC=Doctor of Chiropractic, PT=Physical Therapist, LAc=Licensed Acupuncturist, OS=Orthopedic Surgeon, PMR=Physical Medicine & Rehabilitation, PM=Pain Management, NS=Neurosurgeon, Neuro=Neurologist, Rheu=Rheumatologist, MD Oth=Other MD specialty, EM=Emergency Medicine, Rad=Radiologist, UC=Urgent Care

Cells with red text denote that the effect of provider type on service usage was found not to be significantly different from that of ADI 0-25 % NHW 75-100 reference (Fisher's Exact p > 0.001)

Cells with black text denote that the effect of provider type on service usage was found to be significantly different from that of ADI 0-25 % NHW 75-100 reference (Fisher's Exact p < 0.001)
