# Supplementary material for: Geographic variation in the treatment of spinal disorders: association with health care professional availability, and population socioeconomic status, race, and ethnicity. A retrospective cohort study
Source: bioRxiv or medRxiv preprint supplement (doi:10.1101/2022.08.15.22278722), 2022-08-17
Supplement: Supplementary file [file media-7.pdf]

**Supplement 4a - Risk ratio and 95% confidence interval for % of spinal episodes by initial contact health care provider compared to reference segment of 25-50 Area Deprivation Index (ADI) and 75-100% non-Hispanic white (NHW) population**

| ADI    | % NHW  | All                  |                      |                      |                      | Primary Care (PC)    |                      |                      |                      | Non-Prescriber (NP)  |                      |                        | Specialist (Spec)    |                      |                      |                      |                      |                      |                      | Emergency Medicine/ Urgent Care (EM/UC) |                      |                      |
|--------|--------|----------------------|----------------------|----------------------|----------------------|----------------------|----------------------|----------------------|----------------------|----------------------|----------------------|------------------------|----------------------|----------------------|----------------------|----------------------|----------------------|----------------------|----------------------|-----------------------------------------|----------------------|----------------------|
|        |        | PC                   | NP                   | Spec                 | EM/UC                | PCP                  | Nurse                | PA                   | DO                   | DC                   | PT                   | LAc                    | OS                   | PMR                  | PM                   | NS                   | Neuro                | Rheu                 | MD (Oth)             | EM                                      | Rad                  | UC                   |
| 75-100 | 0-25   | 1.34<br>(1.32, 1.35) | 0.36<br>(0.35, 0.37) | 0.93<br>(0.90, 0.96) | 1.73<br>(1.66, 1.80) | 1.40<br>(1.38, 1.42) | 1.31<br>(1.25, 1.37) | 1.03<br>(0.98, 1.09) | 0.26<br>(0.13, 0.50) | 0.36<br>(0.34, 0.37) | 0.46<br>(0.39, 0.56) | 0.63<br>(0.48, 0.82)   | 0.90<br>(0.84, 0.95) | 0.75<br>(0.68, 0.82) | 1.05<br>(0.93, 1.20) | 1.03<br>(0.91, 1.16) | 1.03<br>(0.92, 1.16) | 1.20<br>(1.05, 1.37) | 0.97<br>(0.88, 1.07) | 2.23<br>(2.11, 2.36)                    | 1.35<br>(1.26, 1.45) | 1.08<br>(0.93, 1.25) |
|        | 25-50  | 1.32<br>(1.30, 1.34) | 0.52<br>(0.51, 0.54) | 0.98<br>(0.94, 1.02) | 1.42<br>(1.35, 1.50) | 1.28<br>(1.26, 1.31) | 1.82<br>(1.75, 1.90) | 0.94<br>(0.88, 1.00) | 0.21<br>(0.09, 0.50) | 0.52<br>(0.51, 0.54) | 0.52<br>(0.42, 0.63) | 0.46<br>(0.32, 0.67)   | 0.97<br>(0.91, 1.04) | 0.78<br>(0.70, 0.87) | 1.24<br>(1.08, 1.43) | 0.91<br>(0.78, 1.05) | 1.04<br>(0.90, 1.19) | 1.19<br>(1.01, 1.39) | 1.01<br>(0.91, 1.13) | 1.70<br>(1.58, 1.82)                    | 1.37<br>(1.26, 1.48) | 0.53<br>(0.41, 0.68) |
|        | 50-75  | 1.35<br>(1.33, 1.38) | 0.58<br>(0.56, 0.59) | 0.95<br>(0.91, 0.98) | 1.23<br>(1.17, 1.30) | 1.33<br>(1.30, 1.35) | 1.89<br>(1.81, 1.96) | 0.85<br>(0.79, 0.91) | 0.60<br>(0.36, 0.99) | 0.58<br>(0.57, 0.60) | 0.50<br>(0.41, 0.60) | 0.26<br>(0.17, 0.41)   | 0.87<br>(0.82, 0.93) | 0.66<br>(0.59, 0.74) | 1.33<br>(1.17, 1.52) | 1.21<br>(1.07, 1.38) | 1.11<br>(0.97, 1.26) | 1.21<br>(1.04, 1.40) | 0.96<br>(0.86, 1.07) | 1.50<br>(1.39, 1.61)                    | 1.17<br>(1.08, 1.28) | 0.37<br>(0.28, 0.49) |
|        | 75-100 | 1.25<br>(1.24, 1.27) | 0.80<br>(0.79, 0.82) | 0.76<br>(0.73, 0.79) | 1.00<br>(0.95, 1.05) | 1.15<br>(1.13, 1.17) | 2.14<br>(2.07, 2.21) | 0.77<br>(0.73, 0.81) | 0.49<br>(0.31, 0.77) | 0.82<br>(0.81, 0.83) | 0.34<br>(0.28, 0.42) | 0.04<br>(0.01, 0.10)   | 0.72<br>(0.68, 0.76) | 0.54<br>(0.49, 0.60) | 0.76<br>(0.67, 0.88) | 1.05<br>(0.94, 1.17) | 0.74<br>(0.65, 0.84) | 1.02<br>(0.89, 1.16) | 0.87<br>(0.79, 0.96) | 1.02<br>(0.95, 1.10)                    | 1.17<br>(1.09, 1.26) | 0.26<br>(0.20, 0.34) |
| 50-75  | 0-25   | 1.19<br>(1.17, 1.20) | 0.43<br>(0.42, 0.44) | 1.11<br>(1.08, 1.14) | 1.44<br>(1.38, 1.49) | 1.36<br>(1.34, 1.38) | 0.81<br>(0.77, 0.84) | 0.70<br>(0.66, 0.74) | 0.52<br>(0.34, 0.78) | 0.41<br>(0.40, 0.42) | 0.71<br>(0.62, 0.80) | 1.55<br>(1.33, 1.81)   | 1.08<br>(1.04, 1.14) | 1.00<br>(0.93, 1.07) | 1.18<br>(1.06, 1.32) | 0.75<br>(0.66, 0.84) | 1.51<br>(1.39, 1.65) | 1.26<br>(1.12, 1.41) | 1.18<br>(1.09, 1.27) | 1.81<br>(1.72, 1.91)                    | 1.19<br>(1.12, 1.27) | 0.79<br>(0.68, 0.92) |
|        | 25-50  | 1.16<br>(1.15, 1.17) | 0.60<br>(0.60, 0.61) | 1.19<br>(1.17, 1.22) | 1.15<br>(1.11, 1.19) | 1.25<br>(1.23, 1.27) | 0.95<br>(0.92, 0.98) | 0.92<br>(0.89, 0.96) | 0.58<br>(0.43, 0.79) | 0.60<br>(0.59, 0.61) | 0.71<br>(0.64, 0.78) | 0.95<br>(0.82, 1.11)   | 1.27<br>(1.23, 1.32) | 1.03<br>(0.98, 1.09) | 1.33<br>(1.23, 1.45) | 0.98<br>(0.90, 1.07) | 1.39<br>(1.29, 1.49) | 1.19<br>(1.09, 1.31) | 1.09<br>(1.02, 1.16) | 1.37<br>(1.31, 1.44)                    | 0.98<br>(0.92, 1.03) | 0.85<br>(0.76, 0.95) |
|        | 50-75  | 1.18<br>(1.17, 1.19) | 0.72<br>(0.71, 0.73) | 1.08<br>(1.06, 1.10) | 1.08<br>(1.05, 1.11) | 1.21<br>(1.20, 1.22) | 1.23<br>(1.20, 1.26) | 0.98<br>(0.95, 1.01) | 0.73<br>(0.58, 0.91) | 0.72<br>(0.72, 0.73) | 0.69<br>(0.63, 0.75) | 0.57<br>(0.49, 0.66)   | 1.08<br>(1.05, 1.12) | 0.89<br>(0.85, 0.94) | 1.35<br>(1.26, 1.45) | 1.12<br>(1.05, 1.20) | 1.18<br>(1.11, 1.26) | 1.18<br>(1.09, 1.28) | 1.06<br>(1.00, 1.12) | 1.20<br>(1.15, 1.25)                    | 1.03<br>(0.99, 1.08) | 0.74<br>(0.67, 0.82) |
|        | 75-100 | 1.10<br>(1.10, 1.11) | 0.97<br>(0.96, 0.98) | 0.81<br>(0.80, 0.83) | 0.97<br>(0.95, 1.00) | 1.05<br>(1.04, 1.06) | 1.48<br>(1.45, 1.51) | 0.96<br>(0.94, 0.99) | 0.81<br>(0.67, 0.98) | 0.98<br>(0.98, 0.99) | 0.54<br>(0.50, 0.58) | 0.21<br>(0.17, 0.25)   | 0.76<br>(0.74, 0.78) | 0.71<br>(0.68, 0.75) | 0.86<br>(0.81, 0.93) | 0.94<br>(0.88, 1.00) | 0.90<br>(0.85, 0.96) | 0.91<br>(0.85, 0.98) | 0.88<br>(0.84, 0.92) | 1.05<br>(1.01, 1.09)                    | 0.99<br>(0.95, 1.03) | 0.55<br>(0.50, 0.60) |
| 25-50  | 0-25   | 1.06<br>(1.04, 1.08) | 0.45<br>(0.44, 0.46) | 1.34<br>(1.30, 1.38) | 1.24<br>(1.18, 1.31) | 1.29<br>(1.26, 1.31) | 0.51<br>(0.47, 0.55) | 0.46<br>(0.42, 0.50) | 0.31<br>(0.16, 0.61) | 0.41<br>(0.39, 0.42) | 0.91<br>(0.79, 1.05) | 4.19<br>(3.68, 4.77)   | 1.22<br>(1.16, 1.29) | 1.08<br>(0.99, 1.18) | 1.37<br>(1.21, 1.55) | 0.81<br>(0.70, 0.94) | 2.26<br>(2.06, 2.48) | 2.06<br>(1.83, 2.31) | 1.43<br>(1.31, 1.56) | 1.39<br>(1.29, 1.49)                    | 0.98<br>(0.90, 1.07) | 1.61<br>(1.40, 1.85) |
|        | 25-50  | 1.04<br>(1.03, 1.05) | 0.69<br>(0.68, 0.70) | 1.29<br>(1.26, 1.32) | 1.04<br>(1.00, 1.08) | 1.20<br>(1.18, 1.22) | 0.63<br>(0.60, 0.66) | 0.66<br>(0.63, 0.70) | 0.55<br>(0.39, 0.77) | 0.67<br>(0.66, 0.68) | 0.97<br>(0.88, 1.07) | 2.71<br>(2.42, 3.03)   | 1.41<br>(1.36, 1.46) | 1.27<br>(1.20, 1.34) | 1.28<br>(1.17, 1.40) | 0.93<br>(0.84, 1.02) | 1.37<br>(1.26, 1.48) | 1.16<br>(1.05, 1.29) | 1.19<br>(1.11, 1.27) | 1.12<br>(1.06, 1.19)                    | 0.90<br>(0.84, 0.96) | 1.24<br>(1.12, 1.39) |
|        | 50-75  | 1.03<br>(1.02, 1.04) | 0.81<br>(0.80, 0.81) | 1.26<br>(1.24, 1.28) | 0.90<br>(0.87, 0.92) | 1.11<br>(1.10, 1.12) | 0.81<br>(0.79, 0.83) | 0.83<br>(0.81, 0.86) | 1.15<br>(0.96, 1.38) | 0.79<br>(0.79, 0.80) | 0.92<br>(0.86, 0.99) | 2.01<br>(1.83, 2.22)   | 1.33<br>(1.29, 1.37) | 1.22<br>(1.17, 1.28) | 1.37<br>(1.28, 1.46) | 1.09<br>(1.02, 1.16) | 1.36<br>(1.28, 1.44) | 1.17<br>(1.09, 1.26) | 1.16<br>(1.10, 1.22) | 0.94<br>(0.90, 0.98)                    | 0.86<br>(0.82, 0.90) | 0.84<br>(0.77, 0.92) |
|        | 75-100 | reference            |                      |                      |                      |                      |                      |                      |                      |                      |                      |                        |                      |                      |                      |                      |                      |                      |                      |                                         |                      |                      |
| 0-25   | 0-25   | 0.95<br>(0.92, 0.98) | 0.55<br>(0.53, 0.57) | 1.24<br>(1.18, 1.30) | 1.32<br>(1.22, 1.42) | 1.21<br>(1.17, 1.25) | 0.27<br>(0.23, 0.32) | 0.32<br>(0.27, 0.38) | 0.52<br>(0.23, 1.18) | 0.44<br>(0.42, 0.46) | 1.42<br>(1.19, 1.69) | 11.02<br>(9.71, 12.51) | 1.27<br>(1.17, 1.38) | 1.35<br>(1.20, 1.52) | 0.84<br>(0.66, 1.07) | 0.57<br>(0.44, 0.75) | 1.96<br>(1.69, 2.27) | 1.22<br>(0.97, 1.52) | 1.15<br>(0.99, 1.33) | 1.21<br>(1.08, 1.37)                    | 1.20<br>(1.05, 1.35) | 2.17<br>(1.81, 2.61) |
|        | 25-50  | 0.89<br>(0.88, 0.90) | 0.69<br>(0.67, 0.70) | 1.54<br>(1.50, 1.58) | 0.97<br>(0.92, 1.01) | 1.12<br>(1.10, 1.14) | 0.30<br>(0.27, 0.32) | 0.31<br>(0.29, 0.34) | 0.48<br>(0.31, 0.74) | 0.62<br>(0.61, 0.63) | 1.40<br>(1.28, 1.55) | 6.84<br>(6.21, 7.54)   | 1.72<br>(1.66, 1.79) | 1.81<br>(1.71, 1.92) | 0.97<br>(0.86, 1.09) | 0.85<br>(0.76, 0.96) | 1.75<br>(1.60, 1.90) | 1.31<br>(1.17, 1.47) | 1.34<br>(1.24, 1.44) | 0.83<br>(0.77, 0.89)                    | 0.93<br>(0.86, 1.00) | 1.68<br>(1.50, 1.88) |
|        | 50-75  | 0.84<br>(0.83, 0.85) | 0.79<br>(0.78, 0.80) | 1.52<br>(1.50, 1.55) | 0.88<br>(0.85, 0.91) | 0.99<br>(0.98, 1.00) | 0.39<br>(0.37, 0.41) | 0.51<br>(0.48, 0.53) | 0.83<br>(0.66, 1.05) | 0.73<br>(0.73, 0.74) | 1.65<br>(1.55, 1.76) | 5.11<br>(4.69, 5.57)   | 1.70<br>(1.66, 1.75) | 1.79<br>(1.72, 1.87) | 1.13<br>(1.05, 1.23) | 0.92<br>(0.86, 1.00) | 1.61<br>(1.51, 1.71) | 1.15<br>(1.06, 1.25) | 1.33<br>(1.27, 1.41) | 0.80<br>(0.76, 0.84)                    | 0.87<br>(0.82, 0.92) | 1.21<br>(1.11, 1.33) |
|        | 75-100 | 0.89<br>(0.88, 0.90) | 0.88<br>(0.87, 0.88) | 1.42<br>(1.39, 1.44) | 0.90<br>(0.87, 0.93) | 0.96<br>(0.95, 0.97) | 0.66<br>(0.64, 0.68) | 0.78<br>(0.75, 0.81) | 1.33<br>(1.10, 1.59) | 0.84<br>(0.83, 0.85) | 1.57<br>(1.48, 1.68) | 2.86<br>(2.60, 3.13)   | 1.56<br>(1.51, 1.60) | 1.68<br>(1.62, 1.75) | 1.06<br>(0.98, 1.14) | 1.09<br>(1.02, 1.17) | 1.38<br>(1.30, 1.47) | 1.14<br>(1.05, 1.23) | 1.20<br>(1.14, 1.26) | 0.84<br>(0.81, 0.88)                    | 0.97<br>(0.92, 1.02) | 0.85<br>(0.78, 0.94) |

PCP=Primary Care Provider, PA=Physician Assistant, DO=Doctor of Osteopathy, DC=Doctor of Chiropractic, PT=Physical Therapist, LAc=Licensed Acupuncturist, OS=Orthopedic Surgeon, PMR=Physical Medicine & Rehabilitation, PM=Pain Management, NS=Neurosurgeon, Neuro=Neurologist, Rheum=Rheumatologist, MD Oth=Other MD specialty, EM=Emergency Medicine, Rad=Radiologist, UC=Urgent

Cells in red are not different than the reference segment of 50-75 ADI and 75-100% NHW (p=.05)
