# Supplementary material for: Geographic variation in the treatment of spinal disorders: association with health care professional availability, and population socioeconomic status, race, and ethnicity. A retrospective cohort study
Source: bioRxiv or medRxiv preprint supplement (doi:10.1101/2022.08.15.22278722), 2022-08-17
Supplement: Supplementary file [file media-8.pdf]

Supplement 5 - % of spinal disorder episodes including health care service

| ADI    | % NHW               | Episodes      | Any          |              |              | First Line   |              |              |              |             |             | Second Line  |              |              |             | Third Line   |             |             |             |
|--------|---------------------|---------------|--------------|--------------|--------------|--------------|--------------|--------------|--------------|-------------|-------------|--------------|--------------|--------------|-------------|--------------|-------------|-------------|-------------|
|        |                     |               | First Line   | Second Line  | Third Line   | CMT          | AC           | PT           | MT           | Acu         | OMT         | Rad          | NSAID        | MMRelax      | MRI         | Opioid       | Inj         | Surg        | CT          |
| Total  |                     | 1510869       | 45.0%        | 52.7%        | 21.5%        | 33.6%        | 19.8%        | 15.9%        | 14.1%        | 1.2%        | 0.9%        | 25.3%        | 22.4%        | 21.1%        | 10.1%       | 15.5%        | 5.9%        | 3.3%        | 3.2%        |
| 75-100 | All                 | 128401        | 32.7%        | 60.0%        | 25.4%        | 24.8%        | 12.2%        | 11.9%        | 8.4%         | 0.2%        | 0.7%        | 27.7%        | 28.9%        | 26.2%        | 9.1%        | 19.0%        | 5.4%        | 3.2%        | 4.5%        |
| 50-75  |                     | 500526        | 41.9%        | 54.7%        | 23.3%        | 32.9%        | 15.3%        | 14.6%        | 10.7%        | 0.5%        | 0.8%        | 26.0%        | 24.1%        | 22.9%        | 9.4%        | 17.3%        | 5.7%        | 3.4%        | 3.6%        |
| 25-50  |                     | 557917        | 47.4%        | 51.3%        | 21.0%        | 35.8%        | 20.7%        | 16.4%        | 14.3%        | 1.1%        | 0.8%        | 24.9%        | 21.1%        | 20.5%        | 10.0%       | 15.1%        | 6.0%        | 3.3%        | 2.9%        |
| 0-25   |                     | 324025        | 50.6%        | 48.9%        | 18.1%        | 34.2%        | 28.3%        | 18.9%        | 21.4%        | 3.1%        | 1.0%        | 24.0%        | 19.4%        | 17.2%        | 11.5%       | 12.2%        | 6.1%        | 3.1%        | 2.4%        |
| All    |                     | 0-25          | 125079       | 28.4%        | 63.6%        | 21.4%        | 17.3%        | 16.6%        | 12.0%        | 11.9%       | 1.8%        | 0.5%         | 28.1%        | 33.8%        | 26.4%       | 9.4%         | 15.0%       | 4.8%        | 2.2%        |
|        | 25-50               | 223789        | 38.2%        | 57.7%        | 22.1%        | 25.6%        | 20.5%        | 15.2%        | 14.7%        | 1.7%        | 0.7%        | 26.8%        | 26.8%        | 23.5%        | 10.2%       | 16.0%        | 5.7%        | 2.9%        | 3.5%        |
|        | 50-75               | 461777        | 43.8%        | 54.0%        | 22.4%        | 31.2%        | 21.9%        | 16.5%        | 15.7%        | 1.5%        | 0.9%        | 26.0%        | 22.8%        | 21.6%        | 10.7%       | 16.2%        | 6.3%        | 3.4%        | 3.1%        |
|        | 75-100              | 700224        | 50.9%        | 48.2%        | 20.8%        | 40.6%        | 18.7%        | 16.5%        | 13.3%        | 0.8%        | 0.9%        | 23.9%        | 18.7%        | 19.0%        | 9.7%        | 15.1%        | 5.8%        | 3.5%        | 2.9%        |
| 75-100 | 0-25                | 35387         | 23.4%        | 66.6%        | 24.0%        | 14.2%        | 13.3%        | 9.4%         | 8.4%         | 0.3%        | 0.6%        | 29.5%        | 35.4%        | 29.4%        | 8.5%        | 17.2%        | 4.7%        | 2.3%        | 5.1%        |
|        | 25-50               | 24343         | 29.8%        | 62.3%        | 26.6%        | 21.2%        | 13.2%        | 11.4%        | 8.8%         | 0.3%        | 0.7%        | 29.0%        | 30.3%        | 27.1%        | 9.5%        | 19.7%        | 5.8%        | 3.1%        | 4.7%        |
|        | 50-75               | 27185         | 31.8%        | 61.0%        | 27.8%        | 24.4%        | 11.9%        | 12.2%        | 8.5%         | 0.2%        | 0.7%        | 28.4%        | 28.4%        | 27.0%        | 9.7%        | 21.6%        | 5.9%        | 3.7%        | 4.4%        |
|        | 75-100              | 41486         | 43.0%        | 52.5%        | 24.2%        | 36.4%        | 10.9%        | 14.2%        | 8.0%         | 0.1%        | 0.9%        | 25.1%        | 22.8%        | 22.5%        | 9.0%        | 18.4%        | 5.2%        | 3.6%        | 3.9%        |
| 50-75  | 0-25                | 49075         | 27.0%        | 65.1%        | 22.3%        | 16.9%        | 15.6%        | 11.2%        | 10.2%        | 0.9%        | 0.5%        | 28.7%        | 34.8%        | 27.6%        | 9.1%        | 16.0%        | 4.8%        | 2.3%        | 4.5%        |
|        | 25-50               | 84091         | 34.7%        | 60.1%        | 24.4%        | 24.0%        | 16.9%        | 13.5%        | 11.7%        | 0.7%        | 0.7%        | 27.7%        | 28.1%        | 25.6%        | 10.1%       | 18.0%        | 6.1%        | 3.1%        | 3.9%        |
|        | 50-75               | 139453        | 38.8%        | 57.2%        | 25.1%        | 29.3%        | 16.3%        | 14.5%        | 11.1%        | 0.4%        | 0.8%        | 27.4%        | 25.0%        | 24.3%        | 10.1%       | 18.7%        | 6.4%        | 3.7%        | 3.6%        |
|        | 75-100              | 227907        | 49.6%        | 48.8%        | 22.0%        | 41.8%        | 14.0%        | 15.7%        | 10.1%        | 0.3%        | 0.9%        | 24.0%        | 19.8%        | 20.1%        | 8.8%        | 16.5%        | 5.4%        | 3.5%        | 3.3%        |
| 25-50  | 0-25                | 29006         | 31.2%        | 61.6%        | 18.7%        | 19.6%        | 18.5%        | 13.1%        | 14.2%        | 2.3%        | 0.5%        | 27.1%        | 32.7%        | 23.7%        | 10.4%       | 12.4%        | 4.9%        | 2.2%        | 4.3%        |
|        | 25-50               | 68794         | 40.2%        | 57.0%        | 21.4%        | 26.9%        | 22.5%        | 15.8%        | 15.3%        | 1.5%        | 0.7%        | 26.5%        | 26.4%        | 22.9%        | 10.2%       | 15.4%        | 5.7%        | 2.8%        | 3.2%        |
|        | 50-75               | 176075        | 44.5%        | 53.8%        | 22.5%        | 31.8%        | 22.4%        | 16.6%        | 15.4%        | 1.2%        | 0.9%        | 25.9%        | 22.3%        | 21.9%        | 10.7%       | 16.2%        | 6.5%        | 3.5%        | 3.1%        |
|        | <b>75-100 - ref</b> | <b>284042</b> | <b>52.5%</b> | <b>47.4%</b> | <b>20.2%</b> | <b>42.1%</b> | <b>19.4%</b> | <b>16.8%</b> | <b>13.5%</b> | <b>0.8%</b> | <b>0.9%</b> | <b>23.6%</b> | <b>17.8%</b> | <b>18.8%</b> | <b>9.5%</b> | <b>14.7%</b> | <b>5.8%</b> | <b>3.5%</b> | <b>2.6%</b> |
| 0-25   | 0-25                | 11611         | 42.0%        | 53.0%        | 16.0%        | 22.6%        | 26.2%        | 20.2%        | 23.5%        | 8.9%        | 0.3%        | 23.4%        | 26.9%        | 19.2%        | 10.2%       | 11.0%        | 4.2%        | 2.0%        | 2.6%        |
|        | 25-50               | 46561         | 45.9%        | 51.8%        | 16.6%        | 28.9%        | 27.8%        | 19.1%        | 22.5%        | 4.7%        | 0.7%        | 24.4%        | 23.1%        | 18.5%        | 10.8%       | 11.3%        | 5.1%        | 2.3%        | 2.4%        |
|        | 50-75               | 119064        | 51.3%        | 48.9%        | 17.9%        | 33.9%        | 30.2%        | 19.8%        | 23.2%        | 3.5%        | 1.1%        | 24.1%        | 19.6%        | 16.9%        | 11.5%       | 12.0%        | 6.1%        | 3.0%        | 2.3%        |
|        | 75-100              | 146789        | 52.2%        | 47.8%        | 19.0%        | 37.1%        | 27.0%        | 17.9%        | 19.3%        | 1.9%        | 1.1%        | 23.9%        | 17.5%        | 17.0%        | 11.8%       | 12.7%        | 6.6%        | 3.6%        | 2.4%        |

ADI=Area Deprivation Index, NHW=Non-Hispanic White, CMT=Chiropractic Manipulative Therapy, AC=Active Care, PT=Passive Therapy, MT=Manual Therapy, Acu=Acupuncture, OMT=Osteopathic Manipulative Therapy, Rad=Radiology, NSAID=prescription Non-Steroidal Anti-Inflammatory medication, MMRelax=prescription skeletal muscle relaxant medication, MRI=Magnetic Resonance Imaging, Opioid=prescription opioid medication, Inj=spinal injection, Surg=spinal surgery, CT=Computed Tomography scan

Cells with red text denote that the effect of provider type on service usage was found not to be significantly different from that of ADI 0-25 % NHW 75-100 reference (Fisher's Exact p > 0.001)

Cells with black text denote that the effect of provider type on service usage was found to be significantly different from that of ADI 0-25 % NHW 75-100 reference (Fisher's Exact p < 0.001)
