# Supplementary material for: Geographic variation in the treatment of spinal disorders: association with health care professional availability, and population socioeconomic status, race, and ethnicity. A retrospective cohort study
Source: bioRxiv or medRxiv preprint supplement (doi:10.1101/2022.08.15.22278722), 2022-08-17
Supplement: Supplementary file [file media-10.pdf]

Supplement 6 - # of days into episode when service first provided - Median (Q1, Q3)

| ADI    | % NHW        | Episodes | Any        |             |            | First Line |           |           |            |           |           | Second Line |           |           |            | Third Line |              |              |           |
|--------|--------------|----------|------------|-------------|------------|------------|-----------|-----------|------------|-----------|-----------|-------------|-----------|-----------|------------|------------|--------------|--------------|-----------|
|        |              |          | First Line | Second Line | Third Line | CMT        | AC        | PT        | MT         | Acu       | OMT       | Rad         | NSAID     | MMRelax   | MRI        | Opioid     | Inj          | Surg         | CT        |
| Total  |              | 1510869  | 0 (0, 20)  | 0 (0, 39)   | 6 (0, 72)  | 0 (0, 0)   | 4 (0, 32) | 0 (0, 21) | 6 (0, 37)  | 0 (0, 19) | 0 (0, 19) | 0 (0, 19)   | 0 (0, 29) | 0 (0, 14) | 20 (3, 78) | 1 (0, 50)  | 39 (7, 107)  | 44 (14, 106) | 0 (0, 40) |
| 75-100 | All          | 128401   | 0 (0, 21)  | 0 (0, 39)   | 2 (0, 65)  | 0 (0, 0)   | 8 (0, 45) | 0 (0, 27) | 8 (0, 44)  | 0 (0, 39) | 0 (0, 10) | 0 (0, 19)   | 0 (0, 22) | 0 (0, 15) | 24 (4, 88) | 1 (0, 45)  | 43 (8, 114)  | 49 (15, 111) | 0 (0, 27) |
| 50-75  |              | 500526   | 0 (0, 19)  | 0 (0, 40)   | 4 (0, 71)  | 0 (0, 0)   | 7 (0, 41) | 0 (0, 22) | 7 (0, 44)  | 0 (0, 35) | 0 (0, 17) | 0 (0, 20)   | 0 (0, 28) | 0 (0, 15) | 22 (4, 84) | 1 (0, 48)  | 43 (8, 114)  | 49 (15, 112) | 0 (0, 38) |
| 25-50  |              | 557917   | 0 (0, 19)  | 0 (0, 39)   | 7 (0, 74)  | 0 (0, 0)   | 4 (0, 31) | 0 (0, 21) | 6 (0, 38)  | 0 (0, 27) | 0 (0, 21) | 0 (0, 18)   | 0 (0, 30) | 0 (0, 13) | 20 (3, 78) | 1 (0, 52)  | 38 (7, 105)  | 43 (13, 103) | 0 (0, 42) |
| 0-25   |              | 324025   | 0 (0, 22)  | 0 (0, 37)   | 10 (0, 77) | 0 (0, 0)   | 2 (0, 24) | 0 (0, 18) | 3 (0, 29)  | 0 (0, 10) | 0 (0, 19) | 0 (0, 16)   | 0 (0, 31) | 0 (0, 10) | 17 (3, 69) | 1 (0, 56)  | 35 (6, 99)   | 39 (11, 98)  | 0 (0, 50) |
| All    | 0-25         | 125079   | 1 (0, 28)  | 0 (0, 28)   | 1 (0, 61)  | 0 (0, 2)   | 5 (0, 33) | 0 (0, 21) | 6 (0, 36)  | 0 (0, 4)  | 0 (0, 18) | 0 (0, 11)   | 0 (0, 10) | 0 (0, 7)  | 20 (3, 74) | 1 (0, 44)  | 38 (5, 106)  | 48 (14, 109) | 0 (0, 17) |
|        | 25-50        | 223789   | 0 (0, 25)  | 0 (0, 33)   | 4 (0, 68)  | 0 (0, 1)   | 3 (0, 30) | 0 (0, 21) | 5 (0, 35)  | 0 (0, 13) | 0 (0, 20) | 0 (0, 14)   | 0 (0, 21) | 0 (0, 9)  | 20 (3, 76) | 1 (0, 47)  | 37 (7, 107)  | 46 (14, 111) | 0 (0, 31) |
|        | 50-75        | 461777   | 0 (0, 22)  | 0 (0, 39)   | 7 (0, 74)  | 0 (0, 0)   | 3 (0, 30) | 0 (0, 21) | 5 (0, 35)  | 0 (0, 16) | 0 (0, 21) | 0 (0, 18)   | 0 (0, 30) | 0 (0, 13) | 20 (3, 76) | 1 (0, 51)  | 38 (7, 105)  | 44 (13, 105) | 0 (0, 46) |
|        | 75-100       | 700224   | 0 (0, 15)  | 0 (0, 44)   | 7 (0, 76)  | 0 (0, 0)   | 5 (0, 35) | 0 (0, 21) | 7 (0, 40)  | 0 (0, 33) | 0 (0, 17) | 0 (0, 22)   | 0 (0, 38) | 0 (0, 17) | 21 (4, 81) | 1 (0, 52)  | 41 (8, 110)  | 43 (14, 105) | 0 (0, 48) |
| 75-100 | 0-25         | 35387    | 2 (0, 31)  | 0 (0, 26)   | 1 (0, 56)  | 0 (0, 4)   | 7 (0, 40) | 0 (0, 25) | 9 (0, 43)  | 0 (0, 26) | 0 (0, 9)  | 0 (0, 11)   | 0 (0, 9)  | 0 (0, 6)  | 22 (3, 83) | 1 (0, 41)  | 41 (5, 108)  | 48 (12, 107) | 0 (0, 12) |
|        | 25-50        | 24343    | 0 (0, 28)  | 0 (0, 35)   | 2 (0, 63)  | 0 (0, 1)   | 8 (0, 44) | 0 (0, 29) | 10 (0, 42) | 0 (0, 27) | 0 (0, 10) | 0 (0, 16)   | 0 (0, 19) | 0 (0, 12) | 24 (4, 86) | 1 (0, 47)  | 41 (9, 111)  | 45 (15, 108) | 0 (0, 20) |
|        | 50-75        | 27185    | 0 (0, 23)  | 0 (0, 45)   | 2 (0, 68)  | 0 (0, 1)   | 8 (0, 47) | 0 (0, 28) | 7 (0, 43)  | 5 (0, 73) | 0 (0, 12) | 0 (0, 24)   | 0 (0, 30) | 0 (0, 20) | 25 (5, 89) | 1 (0, 42)  | 43 (8, 122)  | 46 (14, 111) | 0 (0, 37) |
|        | 75-100       | 41486    | 0 (0, 12)  | 0 (0, 52)   | 4 (0, 74)  | 0 (0, 0)   | 8 (0, 51) | 0 (0, 25) | 7 (0, 47)  | 9 (0, 53) | 0 (0, 8)  | 0 (0, 28)   | 0 (0, 38) | 0 (0, 26) | 26 (6, 93) | 1 (0, 49)  | 46 (8, 117)  | 52 (16, 113) | 0 (0, 45) |
| 50-75  | 0-25         | 49075    | 1 (0, 28)  | 0 (0, 27)   | 1 (0, 60)  | 0 (0, 3)   | 6 (0, 35) | 0 (0, 21) | 8 (0, 42)  | 0 (0, 14) | 0 (0, 18) | 0 (0, 11)   | 0 (0, 11) | 0 (0, 7)  | 20 (3, 74) | 1 (0, 42)  | 42 (8, 108)  | 51 (17, 111) | 0 (0, 13) |
|        | 25-50        | 84091    | 0 (0, 27)  | 0 (0, 35)   | 4 (0, 66)  | 0 (0, 1)   | 6 (0, 37) | 0 (0, 23) | 7 (0, 42)  | 0 (0, 32) | 0 (0, 19) | 0 (0, 15)   | 0 (0, 22) | 0 (0, 11) | 21 (3, 80) | 1 (0, 45)  | 38 (7, 109)  | 46 (14, 109) | 0 (0, 36) |
|        | 50-75        | 139453   | 0 (0, 23)  | 0 (0, 40)   | 5 (0, 72)  | 0 (0, 1)   | 7 (0, 40) | 0 (0, 23) | 8 (0, 44)  | 0 (0, 33) | 0 (0, 19) | 0 (0, 20)   | 0 (0, 29) | 0 (0, 15) | 22 (4, 83) | 1 (0, 48)  | 41 (8, 112)  | 48 (15, 112) | 0 (0, 41) |
|        | 75-100       | 227907   | 0 (0, 12)  | 0 (0, 47)   | 6 (0, 74)  | 0 (0, 0)   | 7 (0, 46) | 0 (0, 22) | 7 (0, 47)  | 4 (0, 61) | 0 (0, 15) | 0 (0, 26)   | 0 (0, 39) | 0 (0, 20) | 24 (5, 88) | 1 (0, 50)  | 46 (10, 119) | 49 (15, 113) | 0 (0, 46) |
| 25-50  | 0-25         | 29006    | 1 (0, 27)  | 0 (0, 28)   | 3 (0, 65)  | 0 (0, 2)   | 2 (0, 27) | 0 (0, 20) | 4 (0, 31)  | 0 (0, 12) | 0 (0, 21) | 0 (0, 12)   | 0 (0, 11) | 0 (0, 7)  | 18 (2, 68) | 1 (0, 51)  | 30 (1, 98)   | 42 (10, 106) | 0 (0, 29) |
|        | 25-50        | 68794    | 0 (0, 24)  | 0 (0, 32)   | 5 (0, 69)  | 0 (0, 1)   | 2 (0, 28) | 0 (0, 20) | 5 (0, 35)  | 0 (0, 18) | 0 (0, 21) | 0 (0, 14)   | 0 (0, 21) | 0 (0, 8)  | 19 (3, 72) | 1 (0, 48)  | 38 (7, 105)  | 49 (16, 113) | 0 (0, 30) |
|        | 50-75        | 176075   | 0 (0, 23)  | 0 (0, 39)   | 7 (0, 73)  | 0 (0, 0)   | 3 (0, 30) | 0 (0, 21) | 6 (0, 37)  | 0 (0, 23) | 0 (0, 26) | 0 (0, 17)   | 0 (0, 31) | 0 (0, 13) | 19 (3, 77) | 1 (0, 51)  | 38 (7, 102)  | 44 (13, 102) | 0 (0, 44) |
|        | 75-100 - ref | 284042   | 0 (0, 15)  | 0 (0, 43)   | 8 (0, 77)  | 0 (0, 0)   | 5 (0, 34) | 0 (0, 21) | 7 (0, 41)  | 0 (0, 41) | 0 (0, 16) | 0 (0, 21)   | 0 (0, 38) | 0 (0, 16) | 21 (3, 82) | 1 (0, 54)  | 40 (8, 107)  | 42 (13, 102) | 0 (0, 48) |
| 0-25   | 0-25         | 11611    | 0 (0, 28)  | 0 (0, 31)   | 5 (0, 76)  | 0 (0, 0)   | 2 (0, 27) | 0 (0, 17) | 0 (0, 27)  | 0 (0, 0)  | 0 (0, 7)  | 0 (0, 10)   | 0 (0, 17) | 0 (0, 4)  | 18 (2, 69) | 1 (0, 49)  | 42 (6, 120)  | 55 (14, 110) | 0 (0, 39) |
|        | 25-50        | 46561    | 0 (0, 24)  | 0 (0, 31)   | 7 (0, 72)  | 0 (0, 0)   | 1 (0, 22) | 0 (0, 17) | 1 (0, 26)  | 0 (0, 6)  | 0 (0, 24) | 0 (0, 13)   | 0 (0, 19) | 0 (0, 5)  | 18 (3, 69) | 1 (0, 50)  | 35 (6, 103)  | 41 (11, 111) | 0 (0, 31) |
|        | 50-75        | 119064   | 0 (0, 22)  | 0 (0, 37)   | 11 (0, 78) | 0 (0, 0)   | 1 (0, 22) | 0 (0, 17) | 2 (0, 28)  | 0 (0, 10) | 0 (0, 15) | 0 (0, 16)   | 0 (0, 32) | 0 (0, 10) | 17 (3, 67) | 2 (0, 58)  | 34 (6, 98)   | 39 (11, 97)  | 0 (0, 58) |
|        | 75-100       | 146789   | 0 (0, 21)  | 0 (0, 40)   | 11 (0, 77) | 0 (0, 0)   | 2 (0, 26) | 0 (0, 20) | 5 (0, 34)  | 0 (0, 20) | 0 (0, 21) | 0 (0, 19)   | 0 (0, 38) | 0 (0, 13) | 18 (3, 69) | 1 (0, 56)  | 35 (7, 99)   | 37 (11, 98)  | 0 (0, 51) |

ADI=Area Deprivation Index, NHW=Non-Hispanic White, CMT=Chiropractic Manipulative Therapy, AC=Active Care, PT=Passive Therapy, MT=Manual Therapy, Acu=Acupuncture, OMT=Osteopathic Manipulative Therapy, Rad=Radiology, NSAID=prescription Non-Steroidal Anti-Inflammatory medication, MMRRelax=prescription skeletal muscle relaxant medication, MRI=Magnetic Resonance Imaging, Opioid=prescription opioid medication, Inj=spinal injection, Surg=spinal surgery, CT=Computed Tomography scan

Cells with red text denote that the effect of provider type on service usage was found not to be significantly different from that of ADI 0-25 % NHW 75-100 reference (Mann-Whitney U p > 0.001)

Cells with black text denote that the effect of provider type on service usage was found to be significantly different from that of ADI 0-25 % NHW 75-100 reference (Mann-Whitney U p > 0.001)
