# Supplementary material for: Geographic variation in the treatment of spinal disorders: association with health care professional availability, and population socioeconomic status, race, and ethnicity. A retrospective cohort study
Source: bioRxiv or medRxiv preprint supplement (doi:10.1101/2022.08.15.22278722), 2022-08-17
Supplement: Supplementary file [file media-11.pdf]

**Supplement 7 - Total episode of care attributes - Median (Q1, Q3)**

| ADI    | % NHW             | Episodes      | Total Episode Cost   | Episode Duration   | # of Health Care Providers Seen |
|--------|-------------------|---------------|----------------------|--------------------|---------------------------------|
| Total  |                   | 1510869       | 195 (65, 662)        | 26 (1, 134)        | 2 (1, 3)                        |
| 75-100 | All               | 128401        | 160 (52, 604)        | 22 (1, 142)        | 2 (1, 3)                        |
| 50-75  |                   | 500526        | 175 (58, 602)        | 25 (1, 140)        | 2 (1, 3)                        |
| 25-50  |                   | 557917        | 198 (68, 648)        | 27 (1, 132)        | 2 (1, 3)                        |
| 0-25   |                   | 324025        | 244 (90, 807)        | 28 (1, 126)        | 2 (1, 3)                        |
| All    |                   | 0-25          | 125079               | 187 (56, 701)      | 15 (1, 114)                     |
|        | 25-50             | 223789        | 202 (65, 711)        | 22 (1, 125)        | 2 (1, 3)                        |
|        | 50-75             | 461777        | 205 (69, 711)        | 28 (1, 136)        | 2 (1, 3)                        |
|        | 75-100            | 700224        | 188 (65, 616)        | 29 (1, 139)        | 1 (1, 3)                        |
| 75-100 | 0-25              | 35387         | 168 (50, 678)        | 13 (1, 114)        | 2 (1, 3)                        |
|        | 25-50             | 24343         | 171 (55, 648)        | 22 (1, 139)        | 2 (1, 3)                        |
|        | 50-75             | 27185         | 165 (55, 626)        | 29 (1, 157)        | 2 (1, 3)                        |
|        | 75-100            | 41486         | 144 (50, 515)        | 29 (1, 156)        | 2 (1, 3)                        |
| 50-75  | 0-25              | 49075         | 181 (54, 687)        | 15 (1, 117)        | 2 (1, 3)                        |
|        | 25-50             | 84091         | 190 (60, 661)        | 22 (1, 131)        | 2 (1, 3)                        |
|        | 50-75             | 139453        | 180 (61, 637)        | 28 (1, 144)        | 2 (1, 3)                        |
|        | 75-100            | 227907        | 165 (55, 549)        | 28 (1, 145)        | 1 (1, 3)                        |
| 25-50  | 0-25              | 29006         | 197 (60, 695)        | 17 (1, 112)        | 2 (1, 3)                        |
|        | 25-50             | 68794         | 203 (66, 710)        | 22 (1, 121)        | 2 (1, 3)                        |
|        | 50-75             | 176075        | 200 (69, 677)        | 27 (1, 134)        | 2 (1, 3)                        |
|        | <b>75-100 ref</b> | <b>284042</b> | <b>194 (68, 610)</b> | <b>29 (1, 135)</b> | <b>1 (1, 3)</b>                 |
| 0-25   | 0-25              | 11611         | 244 (83, 841)        | 22 (1, 106)        | 2 (1, 3)                        |
|        | 25-50             | 46561         | 240 (85, 811)        | 23 (1, 115)        | 2 (1, 3)                        |
|        | 50-75             | 119064        | 257 (94, 860)        | 28 (1, 126)        | 2 (1, 3)                        |
|        | 75-100            | 146789        | 236 (90, 764)        | 29 (1, 132)        | 2 (1, 3)                        |

ADI=Area Deprivation Index, NHW=Non-Hispanic White

Cells with red text denote that the effect of provider type on service usage was found not to be significantly different from that of ADI 0-25 % NHW 75-100 reference (Mann-Whitney U p > 0.001)

Cells with black text denote that the effect of provider type on service usage was found to be significantly different from that of ADI 0-25 % NHW 75-100 reference (Mann-Whitney U p > 0.001)
