# Supplementary material for: Geographic variation in the treatment of spinal disorders: association with health care professional availability, and population socioeconomic status, race, and ethnicity. A retrospective cohort study
Source: bioRxiv or medRxiv preprint supplement (doi:10.1101/2022.08.15.22278722), 2022-08-17
Supplement: Supplementary file [file media-12.pdf]

**Supplement 8 - Ridge regression coefficients (95% Confidence Intervals)**

| Features                                                         |                   | Cost                    | Log Cost                    | Rx-Opioid                   | Rx-NSAID                    |
|------------------------------------------------------------------|-------------------|-------------------------|-----------------------------|-----------------------------|-----------------------------|
| <b>(Intercept)</b>                                               |                   | <b>1152 (627, 1677)</b> | <b>6.399 (6.183, 6.614)</b> | <b>0.106 (0.077, 0.135)</b> | <b>0.176 (0.144, 0.208)</b> |
| # of health care providers (HCP) per 100 population              | PCP               | -48 (-263, 167)         | -0.141 (-0.229, -0.052)     | -0.001 (-0.013, 0.010)      | 0.011 (-0.003, 0.024)       |
|                                                                  | Nurse             | -31 (-182, 120)         | -0.003 (-0.065, 0.059)      | -0.002 (-0.011, 0.006)      | 0.003 (-0.006, 0.012)       |
|                                                                  | PA                | 410 (98, 722)           | 0.045 (-0.083, 0.174)       | 0.002 (-0.016, 0.019)       | -0.021 (-0.041, -0.002)     |
|                                                                  | DO                | -24 (-993, 945)         | 0.069 (-0.329, 0.467)       | 0.012 (-0.041, 0.066)       | 0.014 (-0.045, 0.074)       |
|                                                                  | DC                | -34 (-542, 475)         | 0.214 (0.005, 0.423)        | -0.032 (-0.060, -0.004)     | -0.054 (-0.085, -0.022)     |
|                                                                  | PT                | 257 (-172, 686)         | 0.117 (-0.060, 0.293)       | 0.012 (-0.012, 0.036)       | -0.015 (-0.041, 0.011)      |
|                                                                  | LAc               | -316 (-1271, 638)       | -0.188 (-0.580, 0.204)      | 0.010 (-0.042, 0.063)       | -0.004 (-0.063, 0.054)      |
|                                                                  | OS                | 340 (-595, 1276)        | 0.691 (0.307, 1.075)        | -0.047 (-0.099, 0.004)      | -0.072 (-0.129, -0.015)     |
|                                                                  | PMR               | -88 (-1097, 922)        | 0.333 (-0.081, 0.748)       | 0.017 (-0.039, 0.073)       | 0.039 (-0.023, 0.100)       |
|                                                                  | PM                | 443 (-244, 1130)        | 0.543 (0.261, 0.825)        | 0.050 (0.012, 0.088)        | 0.041 (-0.001, 0.083)       |
|                                                                  | NS                | -511 (-1339, 316)       | -0.016 (-0.356, 0.324)      | -0.011 (-0.057, 0.034)      | -0.032 (-0.083, 0.018)      |
|                                                                  | Neuro             | -141 (-989, 706)        | -0.059 (-0.407, 0.290)      | -0.004 (-0.051, 0.043)      | -0.053 (-0.105, -0.001)     |
|                                                                  | Rheum             | -447 (-1377, 482)       | -0.189 (-0.570, 0.193)      | -0.029 (-0.080, 0.023)      | -0.020 (-0.077, 0.037)      |
|                                                                  | MD (Oth)          | -92 (-261, 77)          | 0.039 (-0.030, 0.109)       | 0.004 (-0.006, 0.013)       | 0.013 (0.003, 0.024)        |
|                                                                  | EM                | 58 (-130, 247)          | 0.028 (-0.049, 0.106)       | -0.007 (-0.017, 0.004)      | -0.007 (-0.019, 0.004)      |
|                                                                  | UC                | -209 (-1010, 592)       | 0.384 (0.054, 0.713)        | 0.027 (-0.017, 0.071)       | 0.004 (-0.045, 0.053)       |
| Rad                                                              | -118 (-582, 346)  | -0.141 (-0.332, 0.050)  | -0.012 (-0.037, 0.014)      | -0.014 (-0.043, 0.014)      |                             |
| % of episodes with health care provider (HCP) as initial contact | PCP               | -280 (-515, -45)        | -0.074 (-0.170, 0.023)      | 0.107 (0.094, 0.120)        | 0.143 (0.129, 0.158)        |
|                                                                  | Nurse             | -511 (-861, -160)       | -0.138 (-0.282, 0.006)      | 0.083 (0.064, 0.103)        | 0.155 (0.134, 0.176)        |
|                                                                  | PA                | 370 (-92, 832)          | 0.103 (-0.087, 0.293)       | 0.036 (0.011, 0.062)        | 0.071 (0.043, 0.099)        |
|                                                                  | DO                | -592 (-1504, 320)       | 0.086 (-0.289, 0.461)       | -0.086 (-0.137, -0.036)     | -0.075 (-0.131, -0.019)     |
|                                                                  | DC                | -927 (-1147, -708)      | -0.349 (-0.439, -0.258)     | -0.113 (-0.125, -0.100)     | -0.167 (-0.180, -0.154)     |
|                                                                  | PT                | -213 (-1170, 745)       | 0.844 (0.450, 1.237)        | -0.136 (-0.189, -0.083)     | -0.038 (-0.097, 0.020)      |
|                                                                  | LAc               | -430 (-1434, 574)       | -0.196 (-0.608, 0.217)      | -0.067 (-0.123, -0.012)     | -0.163 (-0.224, -0.102)     |
|                                                                  | OS                | 2949 (2437, 3461)       | 1.654 (1.444, 1.864)        | 0.072 (0.043, 0.100)        | 0.151 (0.120, 0.182)        |
|                                                                  | PMR               | 1624 (910, 2338)        | 1.981 (1.688, 2.275)        | 0.052 (0.013, 0.092)        | -0.019 (-0.063, 0.025)      |
|                                                                  | PM                | 483 (-447, 1414)        | 1.753 (1.370, 2.135)        | 0.259 (0.207, 0.310)        | -0.013 (-0.070, 0.043)      |
|                                                                  | NS                | 6029 (5146, 6912)       | 3.633 (3.270, 3.996)        | 0.184 (0.135, 0.233)        | 0.025 (-0.029, 0.079)       |
|                                                                  | Neuro             | 1711 (827, 2594)        | 1.623 (1.261, 1.986)        | 0.012 (-0.037, 0.061)       | 0.020 (-0.034, 0.074)       |
|                                                                  | Rheum             | 357 (-632, 1346)        | 0.964 (0.557, 1.370)        | 0.034 (-0.021, 0.089)       | 0.084 (0.024, 0.145)        |
|                                                                  | MD (Oth)          | 2645 (1870, 3420)       | 0.562 (0.243, 0.880)        | 0.039 (-0.004, 0.082)       | 0.110 (0.063, 0.157)        |
| EM                                                               | 519 (-32, 1070)   | 0.595 (0.368, 0.821)    | 0.067 (0.036, 0.097)        | 0.193 (0.160, 0.227)        |                             |
| UC                                                               | -438 (-1457, 580) | 0.069 (-0.349, 0.488)   | 0.014 (-0.042, 0.071)       | -0.006 (-0.069, 0.056)      |                             |
| Rad                                                              | 193 (-469, 854)   | 0.590 (0.318, 0.862)    | -0.135 (-0.172, -0.099)     | -0.160 (-0.200, -0.119)     |                             |
| Zip code population attributes                                   | ADI               | -176 (-352, -0)         | -0.647 (-0.719, -0.575)     | 0.072 (0.062, 0.082)        | 0.050 (0.039, 0.061)        |
|                                                                  | White             | 328 (-131, 787)         | 0.442 (0.253, 0.631)        | 0.011 (-0.014, 0.036)       | -0.022 (-0.050, 0.006)      |
|                                                                  | Black             | -155 (-647, 336)        | 0.688 (0.487, 0.890)        | 0.005 (-0.022, 0.033)       | 0.133 (0.103, 0.163)        |
|                                                                  | Asian             | -70 (-759, 619)         | 0.795 (0.512, 1.078)        | -0.080 (-0.118, -0.042)     | -0.006 (-0.048, 0.036)      |
|                                                                  | Hispanic          | 503 (12, 993)           | 0.927 (0.726, 1.129)        | -0.014 (-0.041, 0.013)      | 0.102 (0.072, 0.132)        |

All features use similar measurement scale: HCP per 100, % initial provider, ADI 0-100, and % population race/ethnicity  
 Red cells represents p-value greater than threshold (0.05) - not significant
