# Supplementary material for: Geographic variation in the treatment of spinal disorders: association with health care professional availability, and population socioeconomic status, race, and ethnicity. A retrospective cohort study
Source: bioRxiv or medRxiv preprint supplement (doi:10.1101/2022.08.15.22278722), 2022-08-17
Supplement: Supplementary file [file media-13.pdf]

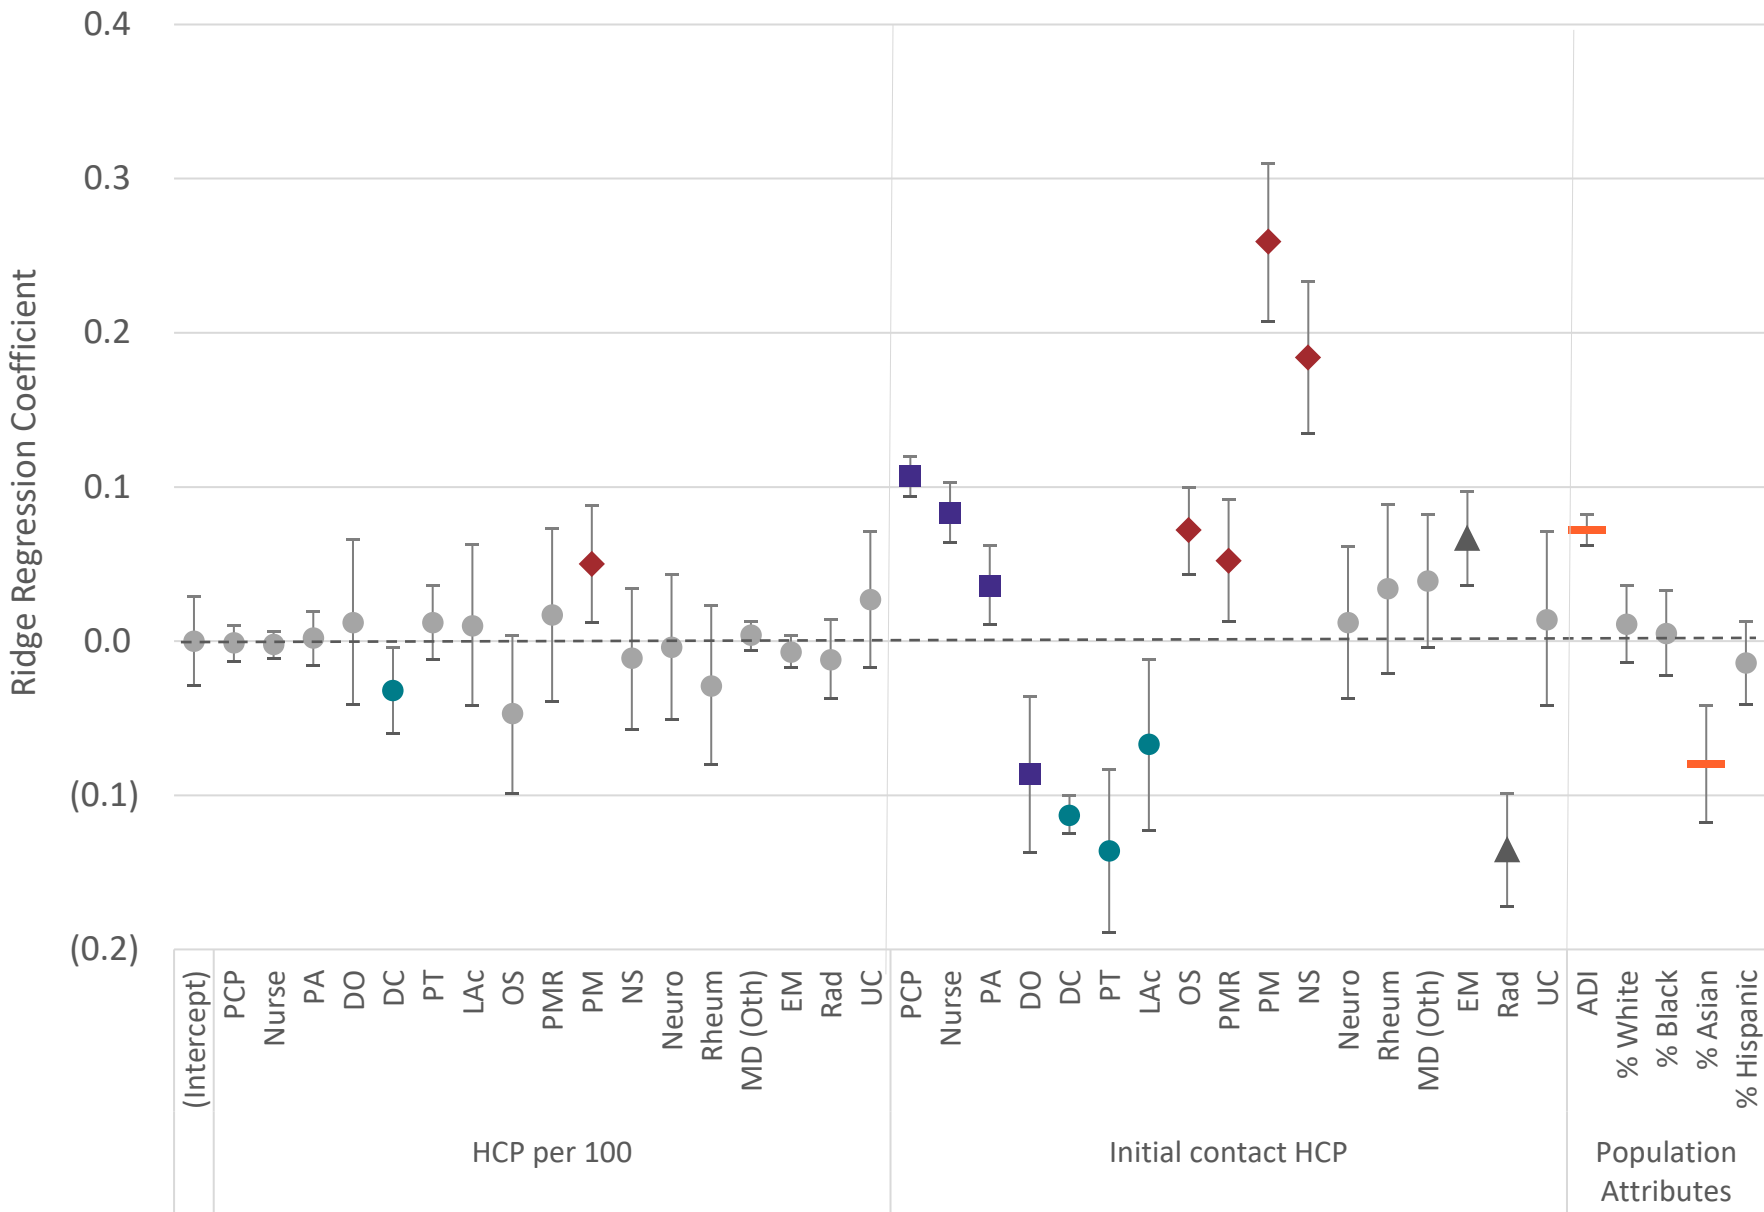

**Supplement 8a** - Ridge regression coefficients for association between health care provider (HCP) availability, initial contact HCP and population attributes on prescription opioid exposure for a spinal disorder episode
