# Supplementary material for: Geographic variation in the treatment of spinal disorders: association with health care professional availability, and population socioeconomic status, race, and ethnicity. A retrospective cohort study
Source: bioRxiv or medRxiv preprint supplement (doi:10.1101/2022.08.15.22278722), 2022-08-17

# Supplement - Maps

### # of Health Care Providers (HCP) Per 1000 Population - Chiropractors

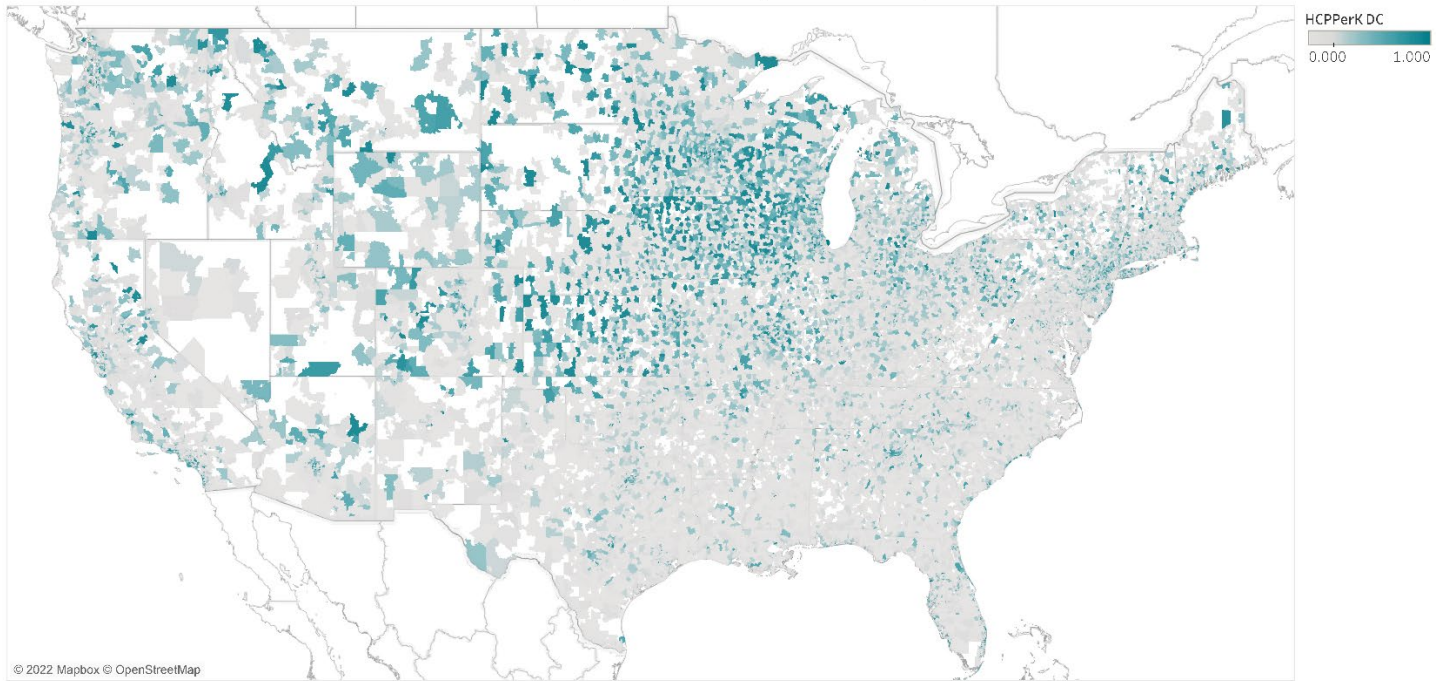

### % of Spinal Disorder Episodes Including Service Type - Rx-Opioid

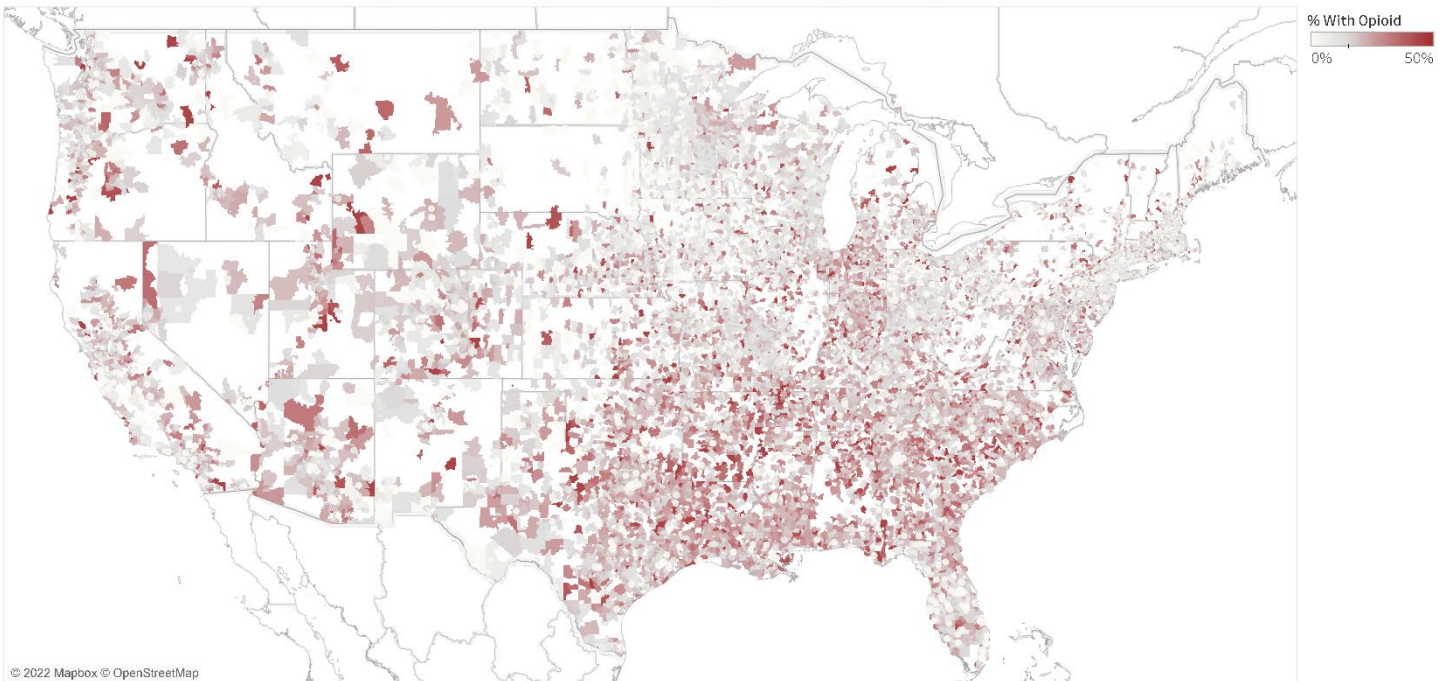

Supplement: Supplementary file [file media-14.pdf]
